# Supplementary material for: Assessing environmental injustice in Kansas City by linking paediatric asthma to local sources of pollution: a cross-sectional study
Source: HighWire-hosted journal article supplement (doi:10.1136/bmjopen-2023-080915), 2024-07-01

Supplemental Figures

Supplemental figure 1: Overall asthma cases per 100 population counts

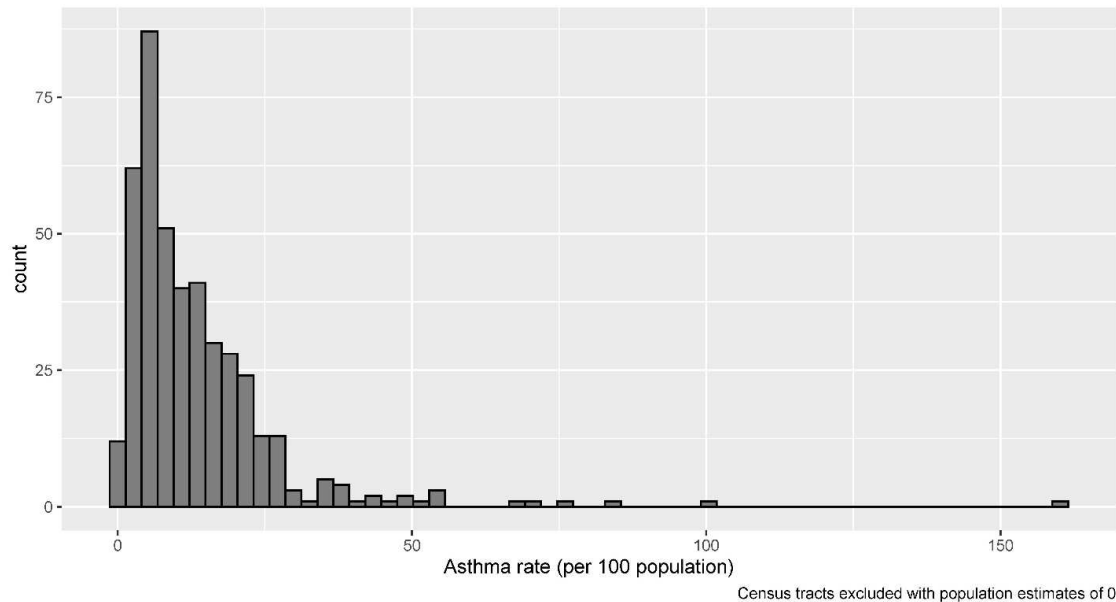

Supplemental figure 2: Acute asthma cases per 100 population counts.

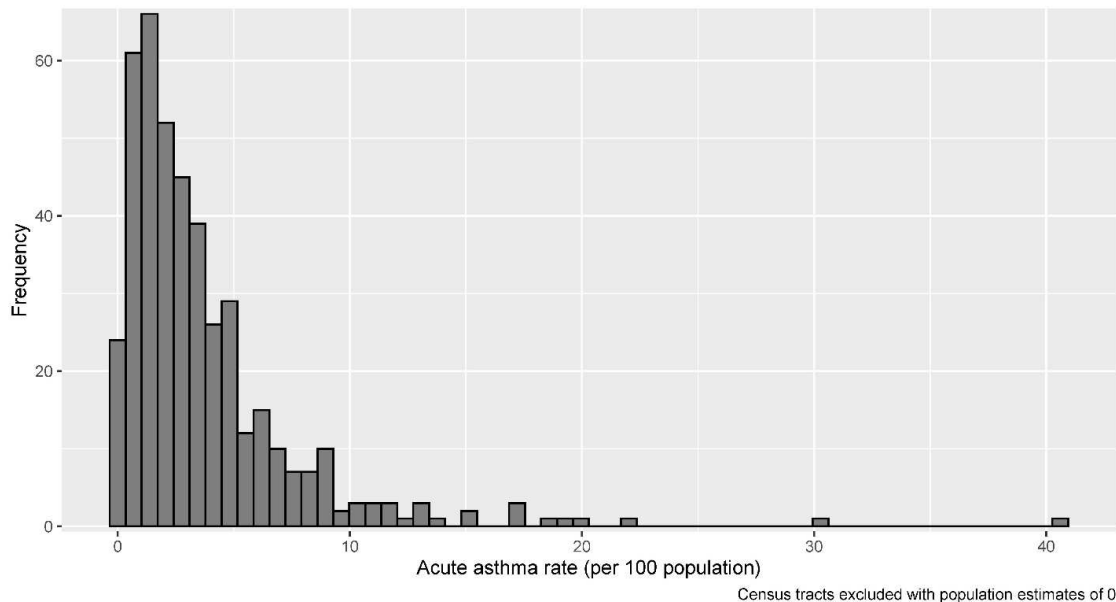

Supplement: bmjopen-2023-080915supp001_data_supplement.pdf [file bmjopen-2023-080915supp001_data_supplement.pdf]
